# Supplementary material for: Ontogeny, conservation and functional significance of maternally inherited DNA methylation at two classes of non-imprinted genes
Source: PubMed Central journal article supplement — Development. 2014 Mar 15;141(6):1313–23. doi: 10.1242/dev.104646 (PMC3943183; doi:10.1242/dev.104646), 2014-03-15
Supplement: supp_141.6.1313_DEV104646.pdf [file supp_141.6.1313_DEV104646.pdf]

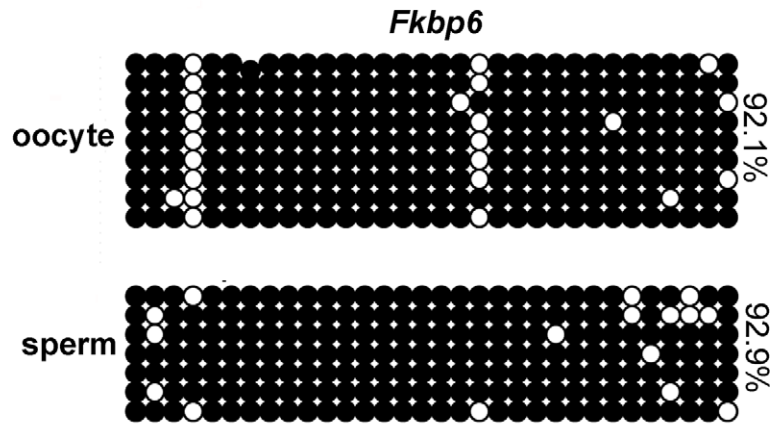

**Fig. S1. Clonal analysis of methylation at *Fkbp6* in WT sperm and oocytes.** Bisulphite sequencing shows that *Fkbp6* is highly methylated in oocyte as has been previously reported, but also confirms COBRA results suggesting that the gene is methylated in sperm collected from cauda epididymis.

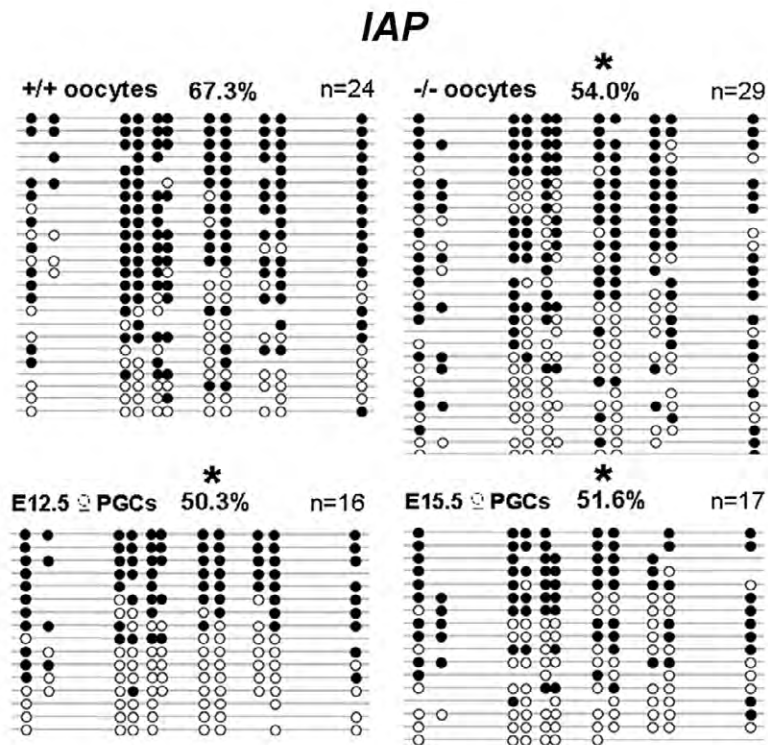

**Fig. S2. Clonal analysis of methylation at *IAP* in WT primordial germ cells, WT oocytes and *Dnmt3L*<sup>-/-</sup> oocytes.** Bisulphite sequencing shows that loss of DNMT3L from murine oocytes causes the methylation of *IAP* sequences to be reduced to a level comparable to that seen during methylation reprogramming in female PGCs at embryonic day (E) 12.5 and E15.5. WT and *Dnmt3L* KO oocytes indicated by +/+ and -/-, respectively. Asterisk denotes a significant difference in methylation ( $P < 0.05$ ) compared to +/+ sample, as determined by Chi-squared test. The number of sequences analysed for each sample is indicated.

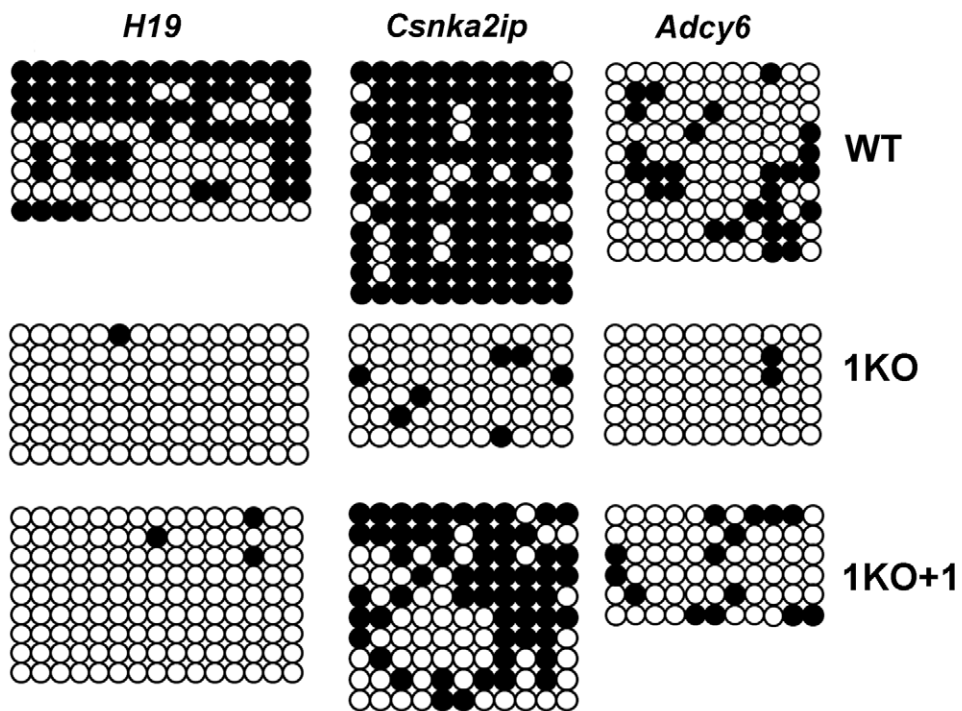

**Fig. S3. Additional bisulphite sequencing data indicating methylation rescue on non-imprinted genes.** Genes from each group (*H19*- imprinted; *Csnka2ip* -testis; *Adcy6*- brain) were analysed in WT ES cells, cells lacking DNMT1 (1KO) and 1KO cells rescued with an expression construct carrying Dnmt1 (1KO+1).

Table S1. Primers used for analysis of transcription and methylation levels

| Application        | Oligo sequence                          |
|--------------------|-----------------------------------------|
| <b>RT-PCR</b>      |                                         |
| <i>ACTB</i> -F     | 5'-gga ctt cga gca aga gat gg-3'        |
| <i>ACTB</i> -R     | 5'-agc act gtg ttg gcg tac ag-3'        |
| <i>Adcy6</i> -F    | 5'-gag atg gct tcg atc atg tc-3'        |
| <i>Adcy6</i> -R    | 5'-cac tgt ctg agg atc aag atc-3'       |
| <i>Csnka2ip</i> -F | 5'-tca gct acg atc aat tca tcc-3'       |
| <i>Csnka2ip</i> -R | 5'-agg acg agg gtt tgg ctt tcc-3'       |
| <i>DAZL</i> -F     | 5'-cgt gga tgt gca gaa gat ag-3'        |
| <i>DAZL</i> -R     | 5'-aac tgt ggt gga gga gga tg-3'        |
| <i>Dpep3</i> -F    | 5'-tgc agt ctg ttt gct aac gt-3'        |
| <i>Dpep3</i> -R    | 5'-ggt atg tag ata cat cct cc-3'        |
| <i>DPEP3</i> -F    | 5'-ttg acc tca ttc acc gca tg-3'        |
| <i>DPEP3</i> -R    | 5'-tgt act gca ggt gaa ggt aag-3'       |
| <i>Fkbp6</i> -F    | 5'-gtt cct gtt caa gcc agc ct-3'        |
| <i>Fkbp6</i> -R    | 5'-ctg aga gtg cac aga act tg-3'        |
| <i>FKBP6</i> -F    | 5'-gat cag cac ccc ctg aag ag-3'        |
| <i>FKBP6</i> -R    | 5'-tct cct gct gta gaa cca tc-3'        |
| <i>Grin3b</i> -F   | 5'-tcc tgg cag ctg cca cag ag-3'        |
| <i>Grin3b</i> -R   | 5'-aga gca cta gag caa tgt cc-3'        |
| <i>Hprt</i> -F     | 5'-gga gat gat ctc tca act tt-3'        |
| <i>Hprt</i> -R     | 5'-cca aca aca aac ttg tct gg-3'        |
| <i>IAP</i> -F      | 5'-caa agg ctt aca aga ctg gc-3'        |
| <i>IAP</i> -R      | 5'-tgt cct ctg atc att tct gc-3'        |
| <i>Piwil1</i> -F   | 5'-aga ctt cag aac cct ctt cc-3'        |
| <i>Piwil1</i> -R   | 5'-gat gac att gta gtg tgt tgg-3'       |
| <i>PIWIL1</i> -F   | 5'-cct ggc ttc act act tcc atc-3'       |
| <i>PIWIL1</i> -R   | 5'-cca gtc aat atc atc cac tct g-3'     |
| <i>Rhox13</i> -F   | 5'-ccg gaa tct gaa tag cag cg-3'        |
| <i>Rhox13</i> -R   | 5-'acg aga gtg atg acg act cg-3'        |
| <i>RHOXF1</i> -F   | 5'-gaa gtt cac gct gtt gca gg-3'        |
| <i>RHOXF1</i> -R   | 5'-ctg atg tcg cct aca tct gg-3'        |
| <i>SYCP1</i> -F    | 5'-cgt acc acc gag atc aag cag c-3'     |
| <i>SYCP1</i> -R    | 5'-cct tcc tga tag tga cag tc-3'        |
| <i>Sycp3</i> -F    | 5'-aat ctg gga agc cac ctt tg-3'        |
| <i>Sycp3</i> -R    | 5'-ctt caa tta tcc cag cag atc-3'       |
| <i>SYCP3</i> -F    | 5'-tct ggg aag ccg tct gtg ga-3'        |
| <i>SYCP3</i> -R    | 5'-cca gca tat tct gca ctt cac ccc c-3' |
| <i>TEX12</i> -F    | 5'-tct cca gtg cca gat agt cc-3'        |
| <i>TEX12</i> -R    | 5'-gca tct act gct gct ctc tc-3'        |
| <i>Tssk2</i> -F    | 5'-gga tgg aag aca ggc tgg ctg-3'       |
| <i>Tssk2</i> -R    | 5'-ctt gtt cct tgc acc tgt gcc-3'       |

| <b>RT-qPCR</b>   |                                      |
|------------------|--------------------------------------|
| <i>Adcy6-F</i>   | 5'-gag atg gct tcg atc atg tc-3'     |
| <i>Adcy6-R</i>   | 5'-cac tgt ctg agg atc aag atc-3'    |
| <i>Crocc-F</i>   | 5'-gcg gag cgc agg ccg cta g-3'      |
| <i>Crocc-R</i>   | 5'-agc ctg gag ctg agg ctg gag-3'    |
| <i>DAZL</i>      | Sequences as for RT-PCR              |
| <i>Dnmt1-F</i>   | 5'-ggctttccagatagctaccg-3'           |
| <i>Dnmt1-R</i>   | 5'-gcaggcagagcttaatctcc-3'           |
| <i>Dnmt3l-F</i>  | 5'-ctc atc cct acc tac ggg ttc-3'    |
| <i>Dnmt3l-R</i>  | 5'-cag tct tcc agt acc aca tcc-3'    |
| <i>Dpep3</i>     | Sequences as for RT-PCR              |
| <i>DPEP3</i>     | Sequences as for RT-PCR              |
| <i>Efna2-F</i>   | 5'-cag cga ggc ttc aag cgc tg-3'     |
| <i>Efna2-R</i>   | 5'-gag gtt ggg agg tgt ggc ag-3'     |
| <i>Fkbp6</i>     | Sequences as for RT-PCR              |
| <i>FKBP6</i>     | Sequences as for RT-PCR              |
| <i>Ggn1-F</i>    | 5'-aag tgc tac tgc cgc cat caa c-3'  |
| <i>Ggn1-R</i>    | 5'-gca agt cgt agt gct cca gg-3'     |
| <i>Grin3b-F</i>  | 5'-tcc tgg cag ctg cca cag ag-3'     |
| <i>Grin3b-R</i>  | 5'-aga gca cta gag caa tgt cc-3'     |
| <i>HPRT-F</i>    | 5'-agc cct ggc gtc gtg att agt-3'    |
| <i>HPRT-R</i>    | 5'-ccc gtt gag cac aca gag gcc ta-3' |
| <i>IAP</i>       | Sequences as for RT-PCR              |
| <i>Piwil1</i>    | Sequences as for RT-PCR              |
| <i>PIWIL1</i>    | Sequences as for RT-PCR              |
| <i>Rhox9-F</i>   | 5'-cga gga tga caa cat cca gg-3'     |
| <i>Rhox9-R</i>   | 5'-tgg gga agc gat tct ctt gg-3'     |
| <i>Rhox13</i>    | Sequences as for RT-PCR              |
| <i>RHOXF1-F</i>  | 5'-cta ctg cct gag tgt ata cc-3'     |
| <i>RHOXF1-R</i>  | 5'-tca tgc cgt tct cgt ggt tc-3'     |
| <i>Snrpn-F</i>   | 5'-tgc tac gtg ggg aga act tg-3'     |
| <i>Snrpn-R</i>   | 5'-cct ggg gaa tag gta cac ctg-3'    |
| <i>Spag12-F</i>  | 5'-tta caa tcc tgg atg cag tc-3'     |
| <i>Spag12-R</i>  | 5'-att cgc aga ggc agc cgc cga a-3'  |
| <i>Spata16-F</i> | 5'-gca gca gga cag ttc agg ac-3'     |
| <i>Spata16-R</i> | 5'-cgt agg tag cat gtg acg agc-3'    |
| <i>SYCP1</i>     | Sequences as for RT-PCR              |
| <i>Sycp3</i>     | Sequences as for RT-PCR              |
| <i>SYCP3</i>     | Sequences as for RT-PCR              |
| <i>Syt2-F</i>    | 5'-gga gcc aaa tgt ggc tcc ggc-3'    |
| <i>Syt2-R</i>    | 5'-cac agc cat ggc gat cag ag-3'     |
| <i>Tbpl1-F</i>   | 5'-aac cgg aag tga gtg gct ag-3'     |
| <i>Tbpl1-R</i>   | 5'-gcg tcg gac gcggag aag aa-3'      |
| <i>TEX12</i>     | Sequences as for RT-PCR              |
| <i>Trim52-F</i>  | 5'-taa gat ggc cac ctc tac ac-3'     |

|                                       |                                               |
|---------------------------------------|-----------------------------------------------|
| <i>Trim52</i> -R                      | 5'-ccg gtc ctg ctc atc ttc ct-3'              |
| <b>COBRA and bisulfite sequencing</b> |                                               |
| <i>Csnka2ip</i> -outer-F              | 5'-tga tat ttt ttg att tga ggg-3'             |
| <i>Csnka2ip</i> -outer-R              | 5'-ccc taa ata tca tct aaa cta cac ct-3'      |
| <i>Csnka2ip</i> -inner-F              | 5'-gag gtt ttt gtt tgt tat tga gtg aag-3'     |
| <i>Csnka2ip</i> -inner-R              | 5'-atc taa atc aca aaa aaa ttc cac a-3'       |
| <i>Dazl</i> -outer-F                  | 5'-taa ttt ttt agt gtt ggt gta gg-3'          |
| <i>Dazl</i> -outer-R                  | 5'-taa atc ccc taa ccc cc-3'                  |
| <i>Dazl</i> -inner-F                  | 5'-gtt tta ttt tgg ggg ttg-3'                 |
| <i>Dazl</i> -inner-R                  | 5'-aaa ctc tct ttc cac cac-3'                 |
| <i>Dpep3</i> -outer-F                 | 5'-gtg tta tta gga atg ttt gga g-3'           |
| <i>Dpep3</i> -outer-R                 | 5'-cac taa cac aca taa atc taa cca-3'         |
| <i>Dpep3</i> -inner-F                 | 5'-gga gta gtt agg gtg tag gtt att-3'         |
| <i>Dpep3</i> -inner-R                 | 5'-att tct aac cac taa caa acc c-3'           |
| <i>Fkbp6</i> -outer-F                 | 5'-tat agg ttt tag agg tgg aag t-3'           |
| <i>Fkbp6</i> -outer-R                 | 5'-cca aac ata aca tta aaa cca-3'             |
| <i>Fkbp6</i> -inner-F                 | 5'-ggg tgt ttg tta ttt atg gt-3'              |
| <i>Fkbp6</i> -inner-R                 | 5'-cca aaa ctc cat cat cct act tta c-3'       |
| <i>Grin3b</i> -outer-F                | 5'-gtg gaa ggt att ggg gag tat tag-3'         |
| <i>Grin3b</i> -outer-R                | 5'-cct cct aac tct tca tcc aaa taa a-3'       |
| <i>Grin3b</i> -inner-F                | 5'- ttt aga ggg att tta ggg tta gg-3'         |
| <i>Grin3b</i> -inner-R                | 5'- aca act cta act ccc cta cca c-3'          |
| <i>H19</i> -outer-F                   | 5'-gag tat tta gga ggt ata aga att-3'         |
| <i>H19</i> -outer-R                   | 5'-atc aaa aac taa cat aaa ccc ct-3'          |
| <i>H19</i> -inner-F                   | 5'-gta agg aga tta tgt tta ttt ttg g-3'       |
| <i>H19</i> -inner-R                   | 5'-cct cat taa tcc cat aac tat-3'             |
| <i>IAP</i> -F                         | 5'-ttg ata gtt gtg ttt taa gtg gta aat aaa-3' |
| <i>IAP</i> -R                         | 5'-caa aaa aaa cac cac aaa cca aaa t-3'       |
| <i>Piwil1</i> -outer-F                | 5'-ggg tgg att tgt ata gtt gtt t-3'           |
| <i>Piwil1</i> -outer-R                | 5'-tcc aat cct atc cta acc cc-3'              |
| <i>Piwil1</i> -inner-F                | 5'-tgt agt ggg ttt tgg tat agg g-3'           |
| <i>Piwil1</i> -inner-R                | 5'-acc ccc tac aac aaa ctt ctc-3'             |
| <i>Rhox13</i> -outer-F                | 5'-agt ggg tag aaa gtt att ggt agt t-3'       |
| <i>Rhox13</i> -outer-R                | 5'-cct cct caa aat cta aaa tat cct-3'         |
| <i>Rhox13</i> -inner-F                | 5'-att att ttg agg gga gtg tg-3'              |
| <i>Rhox13</i> -inner-R                | 5'-cac aac cta taa ctc ctc cac t-3'           |
| <i>Snrpn</i> -outer-F                 | 5'-tat gta ata tga tat agt tta gaa att ag-3'  |
| <i>Snrpn</i> -outer-R                 | 5'-aat aaa ccc aaa tct aaa ata ttt taa tc-3'  |
| <i>Snrpn</i> -inner-F                 | 5'-aat ttg tgt gat gtt tgt aat tat ttg g-3'   |
| <i>Snrpn</i> -inner-R                 | 5'-ata aaa tac act ttc act act aaa atc c-3'   |
| <i>Sycp3</i> -outer-F                 | 5'-agt aaa gat ggt tag gtt agg tgg-3'         |
| <i>Sycp3</i> -outer-R                 | 5'-aac cta acc cca att cct tc-3'              |
| <i>Sycp3</i> -inner-F                 | 5'-gtg agg tgt tta tta tgg aag tg-3'          |
| <i>Sycp3</i> -inner-R                 | 5'-cca act tcc tac cta aat acc c-3'           |

| <b>Pyrosequencing</b>         |                                               |
|-------------------------------|-----------------------------------------------|
| <i>Adcy6-F</i>                | 5'-tgt ttt ggt tta ttt gga aga agt-3'         |
| <i>Adcy6-R(biotinylated)</i>  | 5'-act tat aca aat att cca atc taa aca att-3' |
| <i>Adcy6-seq</i>              | 5'-ggg tta ttt gga aga agt at-3'              |
| <i>Crocc-F</i>                | 5'-ttt gtg tag ggt tga gtg g-3'               |
| <i>Crocc-R(biotinylated)</i>  | 5'-ccc aaa act acc cta tct aac ac-3'          |
| <i>Crocc-seq</i>              | 5'-gtt ggg gat agg ttt-3'                     |
| <i>EFNA-F</i>                 | 5'-tgg agg tga gta tta atg att att t-3'       |
| <i>EFNA-R(biotinylated)</i>   | 5'-acc cca ctc aca aat ata at-3'              |
| <i>EFNA-seq</i>               | 5'-gtg agt att aat gat tat ttg gat-3'         |
| <i>Fkbp6-F</i>                | 5'-tgg ttt tag tta tta att ttg tag taa tgt-3' |
| <i>Fkbp6-R(biotinylated)</i>  | 5'-aca act atc tcc aaa aac ctt ac-3'          |
| <i>Fkbp6-seq</i>              | 5'-gtg ttt tgt ttt tgt gat aga-3'             |
| <i>Piwil1-F</i>               | 5'-att tgg tag ttg ggg ttg tt-3'              |
| <i>Piwil1-R(biotinylated)</i> | 5'-ccc cct aca aca aac ttc tc-3'              |
| <i>Piwil1-seq</i>             | 5'-ggg agt tgg ggt tgt ta-3'                  |
| <i>GRIN3B-F</i>               | 5'-agg ttt ttt agg ggt ttg tta t-3'           |
| <i>GRIN3B-R(biotinylated)</i> | 5'-ata cta caa cct act ccc ctt ac-3'          |
| <i>GRIN3B-seq</i>             | 5'-aga ttt tgt aga tga gta ttt att-3'         |
| <b>In situ hybridisation</b>  |                                               |
| <i>Ddx4</i>                   | Toyooka et al. (2000)                         |
| <i>Fkbp6-F</i>                | 5'-atg gac aag cct ttc gat tct-3'             |
| <i>Fkbp6-R</i>                | 5'- ctg aag atc tgc ttc cac agg-3'            |

Toyooka, Y., Tsunekawa, N., Takahashi, Y., Matsui, Y., Satoh, M. and Noce, T. (2000). Expression and intracellular localization of mouse Vasa-homologue protein during germ cell development. *Mech. Dev.* 93, 139-149.

Table S2. Commercially available methylation pyrosequencing assays used

| <b>Gene</b>   | <b>Assay number</b> |
|---------------|---------------------|
| <i>ADCY6</i>  | PM00160440          |
| <i>Dazl</i>   | PM00291270          |
| <i>DAZL</i>   | PM00013636          |
| <i>DPEP3</i>  | PM00175077          |
| <i>FKBP6</i>  | PM00028973          |
| <i>Grin3b</i> | PM00217091          |
| <i>Peg1</i>   | PM00384230          |
| <i>PIWIL1</i> | PM00051884          |
| <i>Rhox13</i> | PM00434042          |
| <i>SNRPN</i>  | PM00168252          |
| <i>Sycp3</i>  | PM00219744          |
| <i>SYCP3</i>  | PM00052514          |
| <i>Sycp1</i>  | PM 00337001         |
